# Supplementary material for: Vision-Related Quality of Life and Seasonal Affective Disorder in Patients with Glaucoma and Macular Degeneration
Source: MDPI journal article supplement (doi:10.3390/vision6020032), 2022-06-14
Supplement: s1 [file s1]

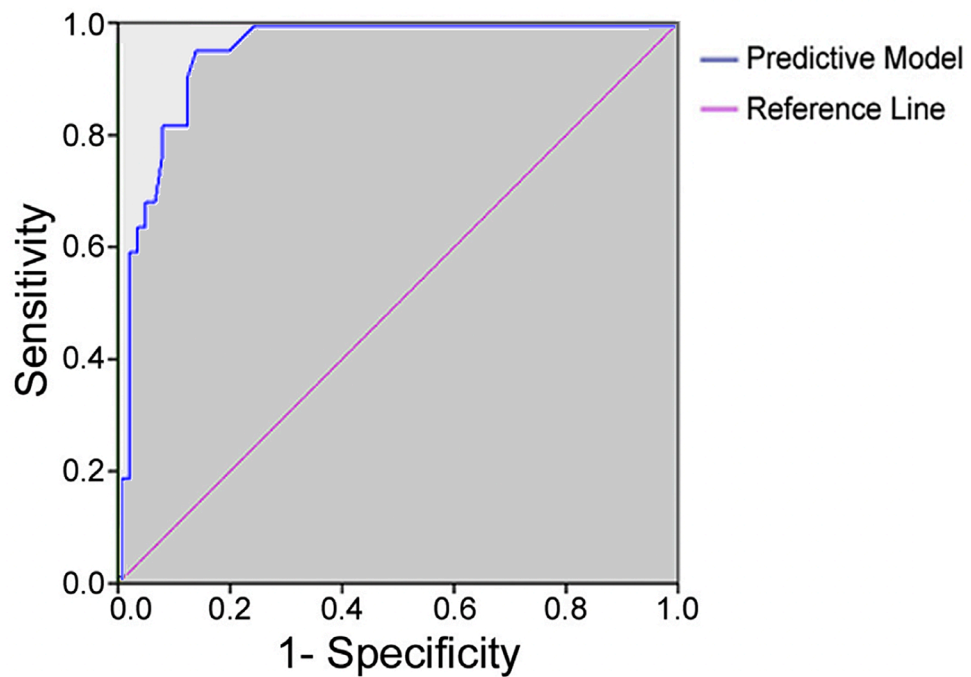

**Figure S1.** Area under receiver operating characteristic (ROC) curve for the final subscale model of questions on the VFQ-39 used to discriminate participants at risk of SAD/sub-SAD from those participants who did not screen positive based on their GSS score.

| Table S1: Primary Components Analysis (PCA) Statistics and Composite Scores for Factors in the NEI-VFQ-39 Questionnaire |                                                                                                                                                                                                                                                | Communality | Component                  |                 |
|-------------------------------------------------------------------------------------------------------------------------|------------------------------------------------------------------------------------------------------------------------------------------------------------------------------------------------------------------------------------------------|-------------|----------------------------|-----------------|
|                                                                                                                         |                                                                                                                                                                                                                                                |             | Vision-associated problems | Quality of life |
| VF2                                                                                                                     | At the present time, would you say your eyesight using both eyes (with glasses or contact lenses, if you wear them) is excellent, good, fair, poor, or very poor or are you completely blind?                                                  | 0.677       | 0.703                      | 0.429           |
| VFA2                                                                                                                    | How would you rate your eyesight now (with glasses or contact lens on, if you wear them), on a scale of from 0 to 10, where zero means the worst possible eyesight, as bad or worse than being blind, and 10 means the best possible eyesight? | 0.469       | 0.58                       | 0.365           |
| VF8                                                                                                                     | How much difficulty do you have reading street signs or the names of stores?                                                                                                                                                                   | 0.567       | 0.598                      | 0.457           |
| VF9                                                                                                                     | Because of your eyesight, how much difficulty do you have going down steps, stairs, or curbs in dim light or at night?                                                                                                                         | 0.491       | 0.612                      | 0.342           |
| VF14                                                                                                                    | Because of your eyesight, how much difficulty do you have going out to see movies, plays, or sports events?                                                                                                                                    | 0.595       | 0.683                      | 0.358           |
| VFA6                                                                                                                    | Because of your eyesight, how much difficulty do you have recognizing people you know from across a room?                                                                                                                                      | 0.564       | 0.603                      | 0.448           |
| VFA7                                                                                                                    | Because of your eyesight, how much difficulty do you have taking part in active sports or other outdoor activities that you enjoy (like golf, bowling, jogging, or walking)?                                                                   | 0.572       | 0.686                      | 0.318           |
| VFA8                                                                                                                    | Because of your eyesight, how much difficulty do you have seeing and enjoying programs on TV?                                                                                                                                                  | 0.648       | 0.7                        | 0.399           |
| VF5                                                                                                                     | How much difficulty do you have reading ordinary print in newspapers?                                                                                                                                                                          | 0.556       | 0.649                      | 0.367           |
| VF6                                                                                                                     | How much difficulty do you have doing work or hobbies that require you to see well up close, such as cooking, sewing, fixing things around the house, or using hand tools?                                                                     | 0.622       | 0.678                      | 0.402           |
| VF7                                                                                                                     | Because of your eyesight, how much difficulty do you have finding something on a crowded shelf?                                                                                                                                                | 0.665       | 0.696                      | 0.424           |
| VFA3                                                                                                                    | Wearing glasses, how much difficulty do you have reading the small print in a telephone book, on a medicine bottle, or on legal forms?                                                                                                         | 0.557       | 0.626                      | 0.406           |
| VFA4                                                                                                                    | Because of your eyesight, how much difficulty do you have figuring out whether bills you receive are accurate?                                                                                                                                 | 0.631       | 0.723                      | 0.33            |
| VFA5                                                                                                                    | Because of your eyesight, how much difficulty do you have doing things like shaving, styling your hair, or putting on makeup?                                                                                                                  | 0.614       | 0.658                      | 0.425           |
| VF15c                                                                                                                   | IF CURRENTLY DRIVING: How much difficulty do you have driving during the daytime in familiar places?                                                                                                                                           | 0.373       | 0.508                      | 0.338           |
| VF16                                                                                                                    | How much difficulty do you have driving at night?                                                                                                                                                                                              | 0.084       | 0.228                      | 0.179           |
| VF12                                                                                                                    | Because of your eyesight, how much difficulty do you have picking out and matching your own clothes?                                                                                                                                           | 0.582       | 0.645                      | 0.407           |
| VF10                                                                                                                    | Because of your eyesight, how much difficulty do you have noticing objects off to the side while you are walking along?                                                                                                                        | 0.507       | 0.651                      | 0.287           |
| VF11                                                                                                                    | Because of your eyesight, how much difficulty do you have seeing how people react to things you say?                                                                                                                                           | 0.528       | 0.626                      | 0.369           |
| VF13                                                                                                                    | Because of your eyesight, how much difficulty do you have visiting with people in their homes, at parties, or in restaurants?                                                                                                                  | 0.497       | 0.599                      | 0.373           |
| VFA9                                                                                                                    | Because of your eyesight, how much difficulty do you have entertaining friends and family in your home?                                                                                                                                        | 0.405       | 0.578                      | 0.267           |
| VF17                                                                                                                    | Do you accomplish less than you would like because of your vision?                                                                                                                                                                             | 0.743       | 0.739                      | -0.443          |
| VF18                                                                                                                    | Are you limited in how long you can work or do other activities because of your vision?                                                                                                                                                        | 0.828       | 0.715                      | -0.563          |
| VFA11a                                                                                                                  | Do you have more help from others because of your vision?                                                                                                                                                                                      | 0.787       | 0.645                      | -0.61           |
| VFA11b                                                                                                                  | Are you limited in the kinds of things you can do because of your vision?                                                                                                                                                                      | 0.812       | 0.707                      | -0.558          |
| VF21                                                                                                                    | I feel frustrated a lot of the time because of my eyesight.                                                                                                                                                                                    | 0.651       | 0.65                       | -0.478          |
| VF22                                                                                                                    | I have much less control over what I do, because of my eyesight.                                                                                                                                                                               | 0.78        | 0.778                      | -0.419          |
| VF25                                                                                                                    | I worry about doing things that will embarrass myself or others, because of my eyesight.                                                                                                                                                       | 0.803       | 0.516                      | -0.733          |
| VFA12                                                                                                                   | I am often irritable because of my eyesight.                                                                                                                                                                                                   | 0.768       | 0.51                       | -0.713          |
| VF20                                                                                                                    | I stay home most of the time because of my eyesight.                                                                                                                                                                                           | 0.867       | 0.708                      | -0.605          |
| VF23                                                                                                                    | Because of my eyesight, I have to rely too much on what other people tell me.                                                                                                                                                                  | 0.877       | 0.755                      | -0.554          |
| VF24                                                                                                                    | I need a lot of help from others because of my eyesight.                                                                                                                                                                                       | 0.89        | 0.75                       | -0.572          |
| VFA13                                                                                                                   | I don't go out of my home alone, because of my eyesight.                                                                                                                                                                                       | 0.796       | 0.661                      | -0.598          |
| VF19                                                                                                                    | How much does pain or discomfort in or around your eyes, for example, burning, itching, or aching, keep you from doing what you'd like to be doing?                                                                                            | 0.69        | 0.393                      | -0.732          |
